# Supplementary material
Source: PubMed Central journal article supplement (PMC2845987)
Supplement: NIHMS184949-supplement-supplementary_material.pdf [file NIHMS184949-supplement-supplementary_material.pdf]

**SUPPORTING INFORMATION**

**The Reopening Rate of the Fingers Domain is a  
Determinant of Base Selectivity for RB69 DNA  
Polymerase**

Harold R. Lee<sup>1</sup>, Mina Wang<sup>1</sup>, and William Konigsberg\*

Department of Molecular Biophysics and Biochemistry, Yale University

333 Cedar Street, New Haven, CT 06520, USA

\*Corresponding author: William Konigsberg, Tel: 203-785-4599, Fax: 203-785-7979

Email: [William.konigsberg@yale.edu](mailto:William.konigsberg@yale.edu), Yale University, Molecular Biophysics and  
Biochemistry Department, 333 Cedar Street, New Haven, CT 06520

<sup>1</sup>Harold R. Lee and Mina Wang made equal contributions to this work.

**This file includes:**

Explanation, scheme and estimated kinetic parameters for the Sequenase:dp/T<sup>+</sup> trapping  
experiment.

Supplemental Figs. 1-2

## Supplemental Material

As mentioned in the main text of the paper, the rate of dAP fluorescence enhancement in the Sequenase:dP/T<sup>+</sup> trapping experiment was biphasic with a rapid rate of 50s<sup>-1</sup> and a slower rate of 4s<sup>-1</sup>. The amplitudes of the fast and slow rates were equal. There are several possible explanations for the biphasic kinetics of the dTTP release rate, assuming that the off rate (*k*<sub>3</sub>) is essentially irreversible in the Sq:dP/T<sup>+</sup> trapping experiment. The justification for this assumption is based on the high affinity of the Sq:dP/T for dNTPs (0.8nM)(Supp. Fig. 2). The most likely possibilities are (i) Parallel pathways for dTTP release from *FDN* where the following scheme would apply:

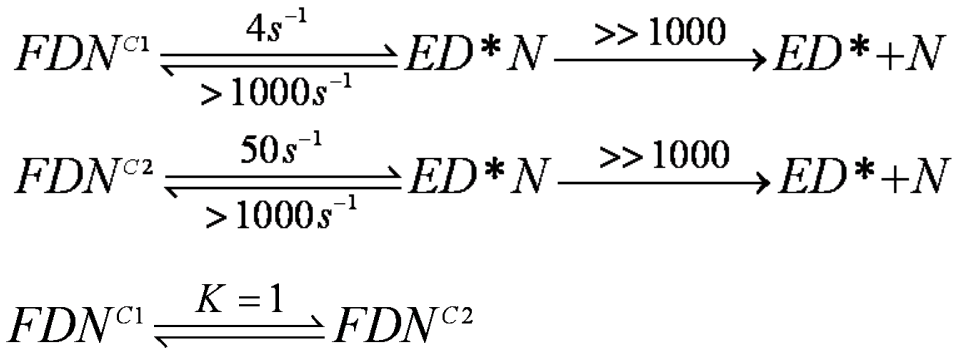

Where the equilibrium constant is ~1 but the rate of interconversion is slow, and where *FDN*<sup>C1</sup> converts to *ED*\**N* at 4s<sup>-1</sup> while *FDN*<sup>C2</sup> converts to *ED*\**N* at 50s<sup>-1</sup>. (ii) A sequential release of dTTP from two low *FDN* fluorescence states: *FDN*<sup>C1</sup> and *FD*\**N*<sup>C2</sup>. In this situation, the following scheme would apply:

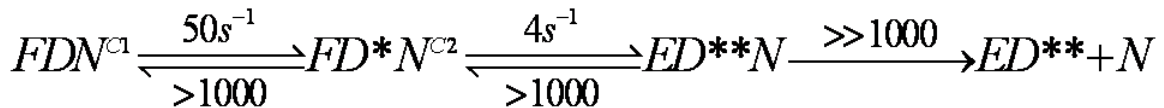

## Figure Legends

**Supplemental Figure 1. Stopped-flow fluorescence scans of dCTP in 50mM MOPS pH 7 and 2mM CaCl<sub>2</sub>.** 0mM dCTP is in black and 1mM dCTP is in red. This suggests that dCTP alone contributes a small amount to the fluorescence quenching in mismatched dCTP binding experiments (0.03V/mM).

**Supplemental Figure 2. Equilibrium fluorescence titrations of 200nM Sequenase and 2nM cy3 labeled dP/T.** The change in Cy3 fluorescence versus [dCTP] fit best to a quadratic equation with a  $K_{dg}^{app}$  of 0.83 ( $\pm$  0.29) nM. The fluorescence change ( $\Delta F$ ) with increasing [dCTP] indicates the amount of fluorescence quenching for the ternary Sq:dP/T:dCTP complex compared with the binary Sq:dP/T complex.

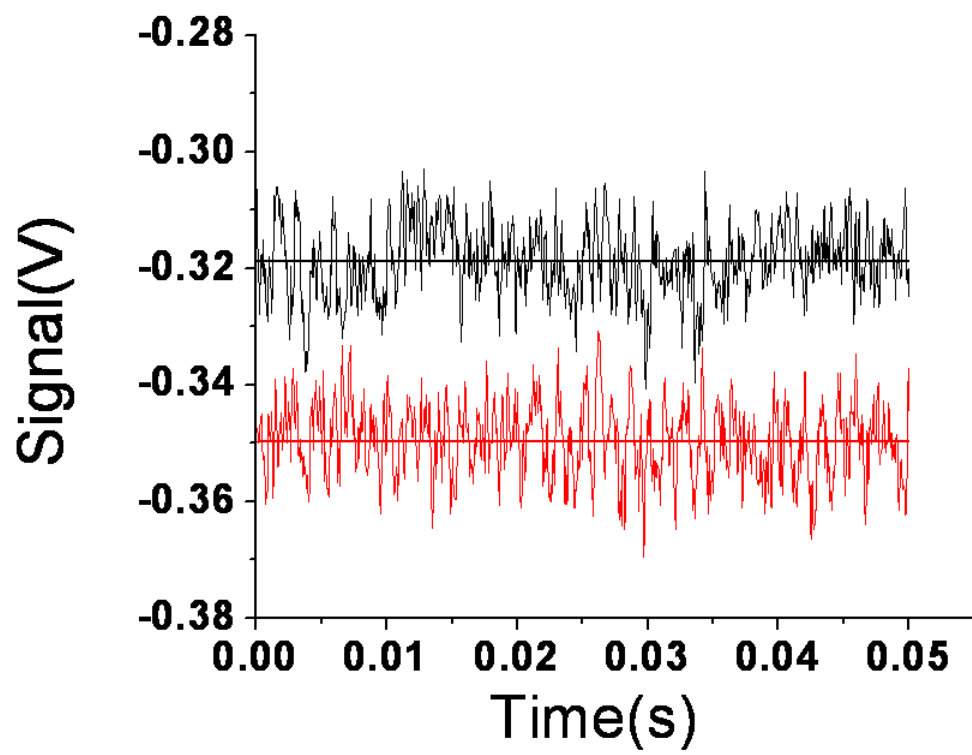

Supplemental Fig. 1

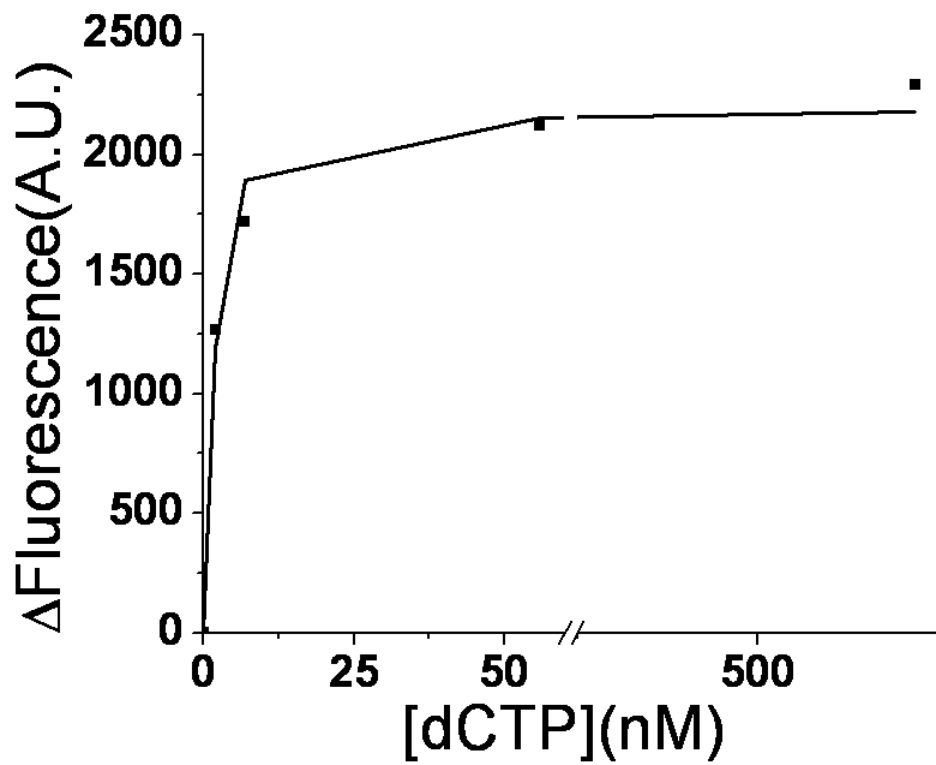

Supplemental Fig. 2
